# Supplementary material for: Taxonomy of Ctenomys (Rodentia: Ctenomyidae) in northwestern Patagonia, Argentina: the occurrence of the “mendocinus” lineage
Source: publisher site journal article supplement (doi:10.1515/mammalia-2021-0032), 2021-04-27
Supplement: Supplementary file 2 [file j_mammalia-2021-0032_suppl.docx]

**Supplementary material**

**Taxonomy of *Ctenomys* (Rodentia: Ctenomyidae) in northwestern Patagonia, Argentina: the occurrence of the “*mendocinus*” lineage**

Mauro N. Tammone and Ulyses F.J. Pardiñas

DOI 10.1515/mammalia-2021-0032

**Appendix 1:** Selected localities (from Bidau 2015, except as noted) that are representative of species in the “*mendocinus*” and “*magellanicus*” lineages. Also are indicated populations of unresolved species identity. Numbers and letters correspond to those used in Figure 1.

**“*mendocinus*” lineage:** *C. mendocinus*.—Mendoza Province: (1) Mendoza (type locality), (2) Nacuñán, (3) El Nihuil (Tammone et al. in press); *C. azarae*.—La Pampa Province, (4) General Acha (type locality), (5) 25 de Mayo; *C. porteousi*.—Buenos Aires Province, (6) Laguna Alsina (= Estación Bonifacio; type locality); *C. australis*.—Buenos Aires Province, (7) Necochea (type locality); *C.* “*chasiquensis*.”—Buenos Aires Province, (8) Laguna Chasicó (Mapelli et al. 2017), *Ctenomys* sp.— Neuquén Province: (a) Reserva Provincial Auca Mahuida (red dot; this paper), (b) Añelo (red dot; this paper).

**“*magellanicus*” lineage:** *C. haigi*.—Neuquén Province, (9) Collón Cura, (10) Zapala; Río Negro Province, (11) Comallo, (12) Pilcaniyeu, (13) Cerro Corona (Teta and D’Elía 2020); Chubut Province, (14) El Maitén (type locality), Talagapa (Teta and D’Elía 2020). *C. bidaui*.—Chubut Province, (15) Puerto Pirámides (type locality, Teta and D’Elía 2020). *C. contrerasi*.—Chubut Province, (16) Estancia El Desempeño (type locality, Teta and D’Elía 2020).

**Populations of unresolved species status**: Río Negro Province: (17, 18, 19) Aguada Cecilio, Arroyo Los Berros, San Antonio Oeste, respectively, assigned to *C. sericeus* (“*magellanicus*” lineage) by Thomas (1929), who indicated that it may grade into *C. mendocinus*, (20) Pichi Mahuida assigned to *C. mendocinus* but it may grade into *C. azarae* (Thomas 1927a), (21, 22) Choele-Choel, Las Perlas, respectively, un-sampled, (23) Angostura 1 archaeological site *Ctenomys* sp. (Fernández et al. 2011); Neuquén Province: (24) Chos-Malal assigned to a combinations of names including, *C. mendocinus*, *C. haigi*, *C. maulinus*, or a combination of them (Thomas 1926a, b; Thomas and Saint Leger 1926).

**References**

Bidau, C.J. (2015). Family Ctenomyidae Lesson, 1842. In: Patton, J.L., Pardiñas, U.F.J. and D'Elía, G. (Eds.) *Mammals of South America, Volume 2. Rodents.* University of Chicago Press, Chicago, USA, pp. 818-877.

Fernández, F.J., del Papa, L.M., Moreira, G.J., Prates, L. and De Santis, L.J.M. (2011). Small mammal remains recovered from two archaeological sites in the middle and lower Negro River valley (Late Holocene, Argentina): taphonomic issues and paleoenvironmental implications. Quat. Int. 245**:** 136-147.

Mapelli, F.J., Mora, M.S., Lancia, J.P., Gómez Fernández, M.J., Mirol, P.M. and Kittlein, M.J. (2017). Evolution and phylogenetic relationships in subterranean rodents of the *Ctenomys mendocinus* species complex: effects of Late Quaternary landscape changes of Central Argentina. Mamm. Biol. 87**:** 130-142.

Teta, P. and D'Elía, G. (2020). Uncovering the species diversity of subterranean rodents at the end of the World: three new species of Patagonian tuco-tucos (Rodentia, Hystricomorpha, *Ctenomys*). PeerJ 8**:** e9259.

Thomas, O. (1927a). On further Patagonian mammals from Neuquen and the Rio Colorado collected by Señor E. Budin. Ann. Mag. Nat. Hist. 9th series, 20**:** 199-205.

Thomas, O. (1927b). On a further collection of mammals made by Sr. E. Budin in Neuquen, Patagonia. Ann. Mag. Nat. Hist. 9th series, 19**:** 650-658.

Thomas, O. (1929). The mammals of Señor Budin's Patagonia Expedition, 1927-28. Ann. Mag. Nat. Hist. 10th Series, 4**:** 35-45.

Thomas, O. and Saint Leger, J. (1926). The Spedan Lewis South American Exploration. V. Mammals obtained by Señor E. Budin in Neuquén. Ann. Mag. Nat. Hist. 9th Series, 18**:** 635-641.
